# Supplementary material
Source: publisher figshare collection journal article supplement (https://acs.figshare.com/ndownloader/files/4701127)
Supplement: Supplementary file 1 [file 4701127]

Supporting Information for

## **Solution-Processed p-Type Transparent Conducting BaCu<sub>2</sub>S<sub>2</sub> Thin Film**

Yaoming Wang, Minling Liu, Fuqiang Huang\*, Lidong Chen, Huiliang Li, Xinping Lin, Wendeng Wang and Yujuan Xia

State Key Laboratory of High Performance Ceramics and Superfine Microstructure, Shanghai Institute of Ceramics, Chinese Academy of Sciences, Shanghai 200050, China

\* To whom correspondence should be addressed. Phone: (+86)-21-52411620, FAX: (+86)-21-62405122, Email: huangfq@mail.sic.ac.cn

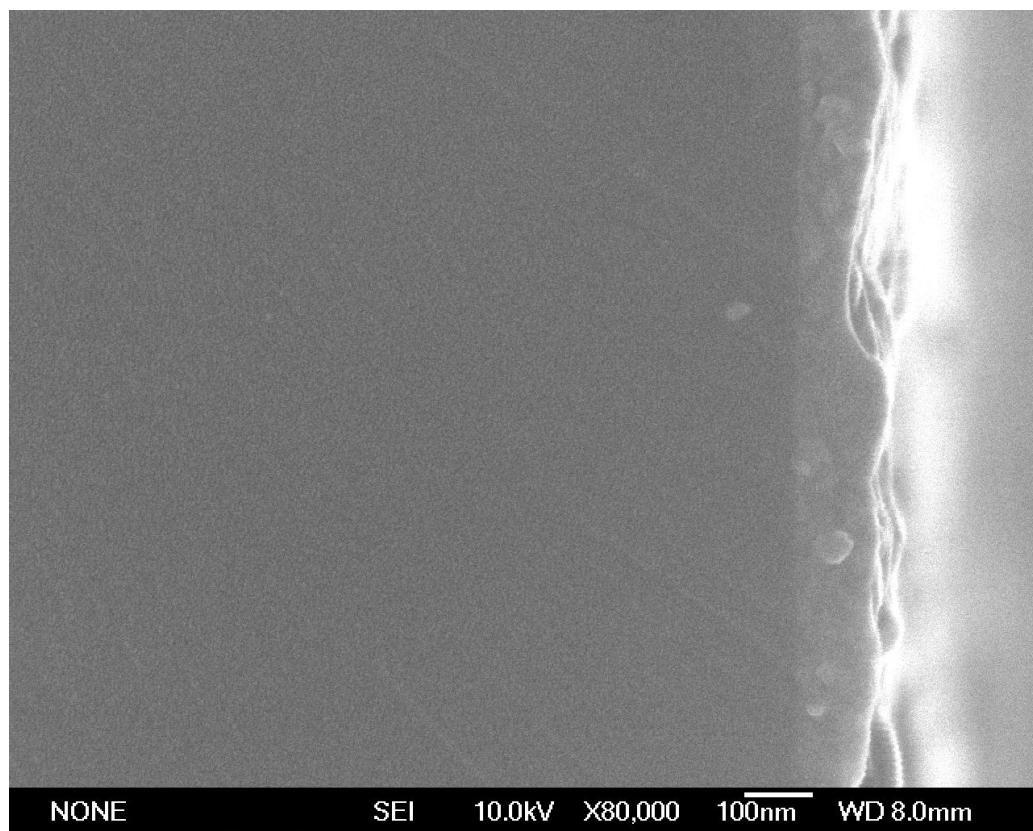

**Figure S1.** Cross-sectional SEM image of BaCu<sub>2</sub>S<sub>2</sub> thin film

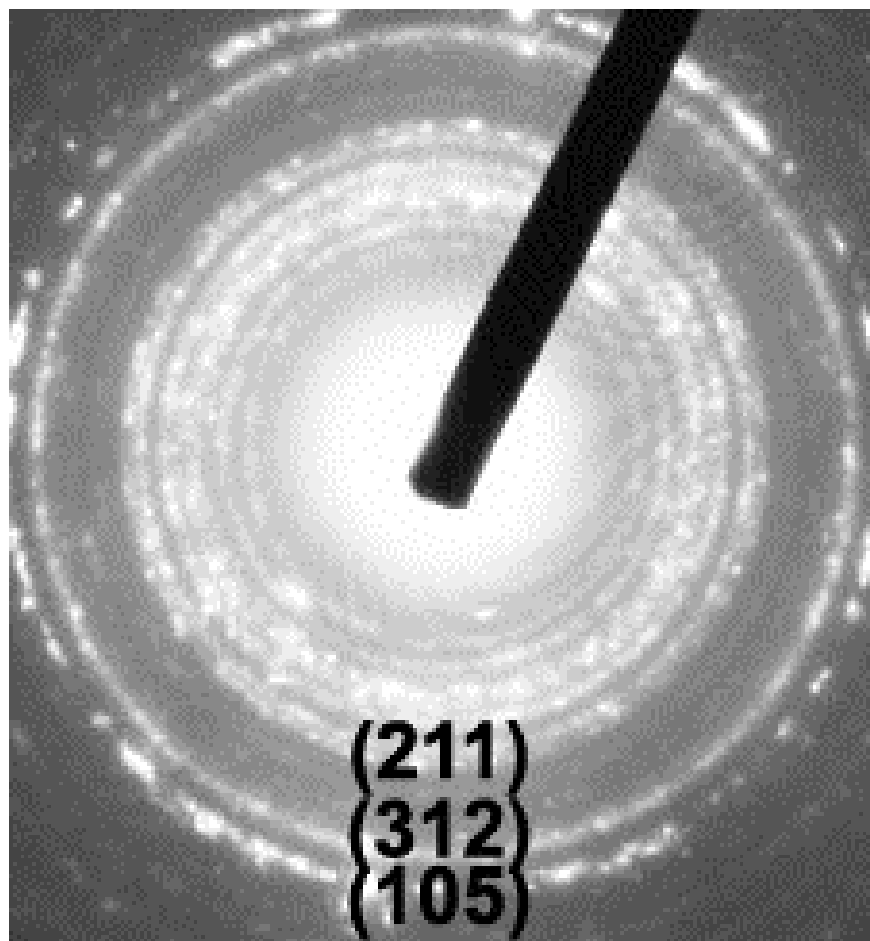

**Figure S2.** Electronic diffraction pattern of the BaCu<sub>2</sub>S<sub>2</sub> thin film
